# Supplementary material for: Heterogeneity of PD-L1 expression on tumor cells and tumor-infiltrating immune cells between the primary tumor and matched lymph node metastases in head and neck squamous cell carcinomas
Source: Research Square preprint supplement (doi:10.21203/rs.3.rs-5390534/v1), 2024-12-17
Supplement: Supplementary file 1 [file 75e637e962e3410ba188be1d.docx]

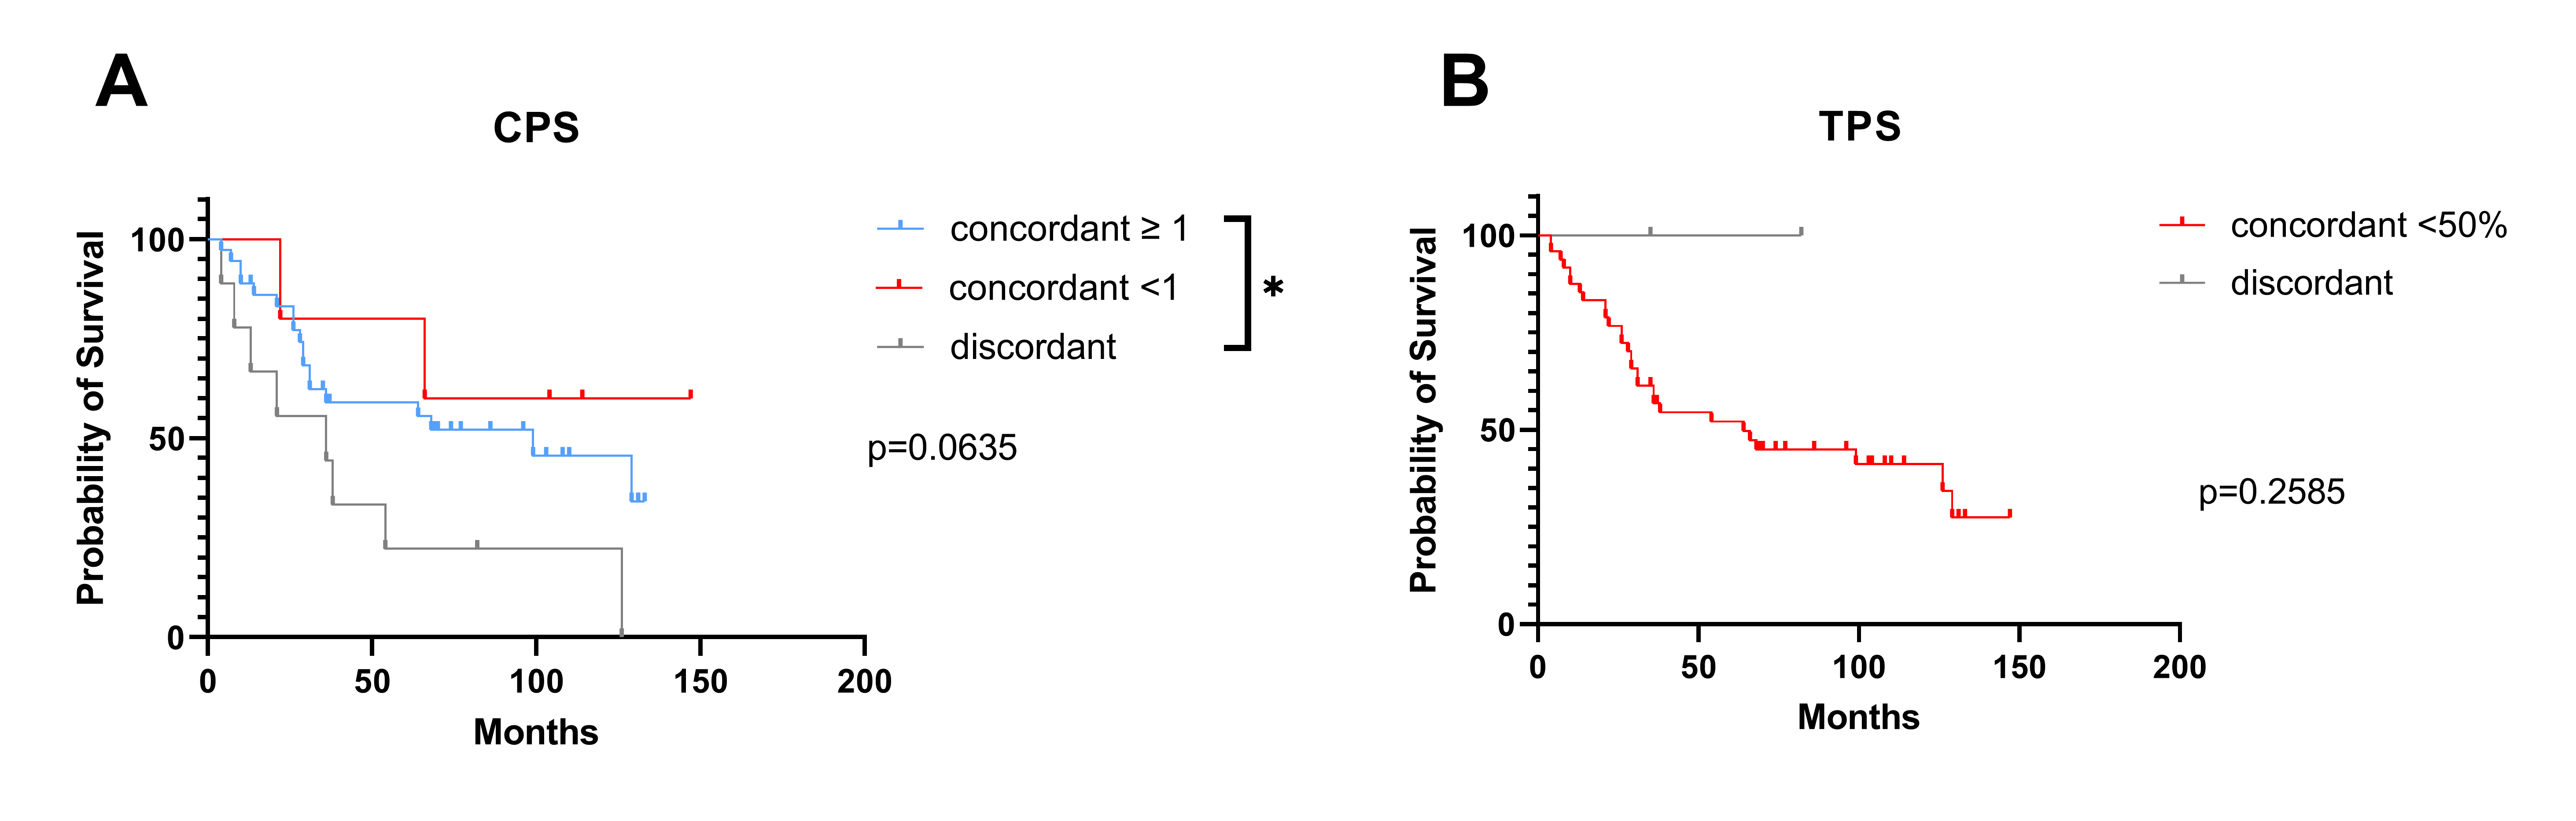


Prognostic impact of PD-L1 expression concordance between primary tumors and lymph node metastases (n=50) assessed by CPS (A) and TPS (B). Blue: CPS ≥ 1 or TPS ≥ 50% concordance. Red: CPS < 1 or TPS < 50% concordance. Grey: discordant expression between primary and metastatic sites.
